# Supplementary material for: Optimizing nutrient management protocol for Ophiopogon japonicus-corn intercropping: impacts on growth, yield, and medicinal quality
Source: PeerJ. 2025 Jul 14;13:e19655. doi: 10.7717/peerj.19655 (PMC12269784; doi:10.7717/peerj.19655)
Supplement: Supplemental Information 1 [file peerj-13-19655-s001.xlsx]

## Sheet: Sheet1
	Corn							Ophiopogon japonicus
	Corn plant height	Corn stem diameter	Number of corn leaf	Fresh biomass of corn leaf	Fresh biomass of corn stem	Fresh biomass of corn with husks	Corn yield	OJ plant height	OJ storage root	OJ nutritive root	OJ root tuber	Fresh biomass of OJ leavf	Fresh biomass of OJ rhizome	Fresh biomass of OJ storage root	Fresh biomass of OJ nutritive root	OJ yield	Extract	Total polysaccharide content	Total saponin conten	Total flavonoid content	Ophiopogon saponin D	Flavanone A	Flavanone B
T1-1	298.7	9.2	12.7	31.5	38.3	26.1	95.9	27.5	17.9	9.5	12	22.8	2.9	7.5	2.8	10.7	84.5	67.2	0.2	0.2	0.2	60.2	48.3
T1-2	304.6	9	13	27	31.5	23.4	81.9	26.7	14.4	5.2	12.6	19.7	2.5	5.7	3.4	10.9	83	67.9	0.1	0.2	0.2	67	35.4
T1-3	294.3	9.5	13.2	29.3	34.9	24.8	88.9	26	18.2	10.1	13.3	20.9	3.1	8.5	2.7	11.5	83.8	67.5	0.1	0.2	0.2	63.6	41.8
T2-1	298.3	8.4	12.5	24.8	33.3	21.2	79.2	23.8	20.1	7.9	15.7	20.2	3.2	7	2.6	14.1	85	65.3	0.1	0.2	0.2	80.7	44.5
T2-2	310.8	8	13	31.5	34.2	23.9	89.6	24.5	17.6	8.6	13.9	22.1	3.4	7.7	3.2	12.3	85.1	63.2	0.2	0.2	0.2	90.4	56.8
T2-3	310.6	7.6	13.2	28.1	33.8	22.5	84.4	25.5	15.9	10.9	11.1	22.2	3	7.5	5.4	15	85	64.2	0.1	0.2	0.2	85.5	50.7
T3-1	300.8	8.3	13.5	31.5	31.1	24.8	87.3	30	21	9.7	18.6	25.9	3	9.2	4.3	13.5	84.4	65.8	0.2	0.2	0.3	52.2	32.6
T3-2	302.2	8.9	13.3	36	32.4	29.3	97.7	25.2	17.7	8.5	15.2	20.7	2.8	6.1	3.4	14.5	84.8	69.2	0.2	0.2	0.3	53.1	32.2
T3-3	298.7	8.4	13.2	33.8	31.1	27	91.8	22.5	16.9	9.1	14.6	18.8	2.6	7.9	2.5	13.5	84.6	67.5	0.2	0.2	0.3	52.7	32.4
T4-1	300.4	9.2	13.7	33.8	38.3	22.5	94.5	27.5	18.6	10.7	14.2	28	3.6	8.3	5.8	16.7	84.5	69	0.2	0.2	0.5	79.5	46.8
T4-2	304.6	9.2	13.8	29.3	36	24.8	90	27.7	18.1	9.3	15.3	23.6	2.4	6.9	4.8	17.3	83.3	63.5	0.2	0.2	0.4	70.1	43.7
T4-3	306	8.9	13.2	31.5	37.1	23.6	92.3	24.8	15.7	9.5	13.1	18.7	1.8	6.7	3.5	15.1	83.9	66.2	0.2	0.2	0.5	74.8	45.2
T5-1	299.7	8.7	13	40.5	33.8	24.8	99	25.7	18.7	8.6	13.9	17.9	2.8	7.1	4.4	15.8	83.2	64.9	0.2	0.2	0.3	107.9	66.3
T5-2	289.4	7.8	12.7	38.3	40.5	29.3	108	21.6	15.1	8.6	13.2	21.5	1.6	8.2	4.4	16.8	82.4	65.4	0.2	0.2	0.3	99.9	60.7
T5-3	277.2	8.9	12.8	39.4	37.1	27	103.5	21.4	18.4	7.4	16.2	19.9	2.5	6.4	2.3	17.4	82.8	65.1	0.2	0.2	0.3	103.9	63.5
T6-1	294.2	8.9	12.8	33.8	34.7	24.8	93.2	25.8	19.4	6.5	16.3	20.9	2.7	7.2	2.8	16.5	83.3	64.8	0.2	0.2	0.3	80.2	61.4
T6-2	300.2	8.5	12.3	27	33.3	27	87.3	24.5	14.6	6.6	11.8	20.2	2.8	6.9	3.1	17.8	84.6	66.5	0.2	0.2	0.3	96.3	69.6
T6-3	308	9.7	14.2	30.4	33.3	25.9	89.6	24.3	16.7	9.1	12.1	21.8	2.8	5.8	3.8	15	83.9	65.7	0.2	0.2	0.3	88.3	65.5
T7-1	304.2	9.8	12.8	36	33.8	24.8	94.5	22.8	18.7	7.9	15.1	19.5	2.2	6.8	3.4	17.8	83.3	65.5	0.2	0.2	0.4	92.3	58.3
T7-2	298.1	8	13	33.8	36	27	96.8	23.3	19.5	5.7	17.5	19.4	3.4	7.1	3.1	15.4	82.6	63.8	0.2	0.2	0.5	98.8	56.4
T7-3	297.5	8.2	12.5	34.9	34.9	25.9	95.6	23.6	17.7	6.2	16	19.7	1.1	6.3	2.1	17.6	82.9	64.7	0.2	0.2	0.4	95.5	57.4
T8-1	297.6	8.7	12.5	33.8	36.5	25.7	95.9	23.2	18.6	9.9	14.9	19.7	2.8	9.5	4.3	18.4	83	60.7	0.2	0.2	0.3	79.1	46.2
T8-2	306.1	9.3	12.5	36	36	27.5	99.5	23.4	20.6	8.7	16.1	22.3	3.8	10.2	4.6	16.2	83.4	62.3	0.2	0.2	0.4	59.2	36
T8-3	297.5	8.3	13	34.9	35.6	27.9	98.3	23.8	20.1	8.3	18.2	17.9	2.5	8.1	3.1	19.1	83.2	61.5	0.2	0.2	0.4	69.1	41.1
